# Supplementary material for: Application of response surface methodology and green carbon dots as reducing agents in speciation of iron
Source: Royal Society of Chemistry journal article supplement (doi:10.1039/c7ra12139c), 2018-01-01
Supplement: c7ra12139c1.pdf [file c7ra12139c1.pdf]

**Application of response surface methodology and green carbon dots as  
reducing agent in speciation of iron**

Masoud Shariati-Rad\*, Tahereh Mohseninasab, Fatemeh Parno

Department of Analytical Chemistry, Faculty of Chemistry, Razi University, Kermanshah, Iran

\*Corresponding author: Fax: (+ 98) 833 4274559, E– mail: [mshariati\\_rad@yahoo.com](mailto:mshariati_rad@yahoo.com)

**Table S1**

Experiments designed based on RSM for exploring the influence of concentration of CDs and 1,10-phenanthroline on the complex formation between  $\text{Fe}^{3+}$  ( $5.00 \times 10^{-5} \text{ mol L}^{-1}$ ) and 1,10-phenanthroline.

| Experiment NO. | Concentration of CD ( $\text{mg L}^{-1}$ ) | Concentration of 1,10-phenanthroline ( $\text{mol L}^{-1}$ ) | Response |          |
|----------------|--------------------------------------------|--------------------------------------------------------------|----------|----------|
|                |                                            |                                                              | Grape CD | Onion CD |
| 1              | 300.0                                      | 0.0055                                                       | 0.287    | 0.188    |
| 2              | 1700.0                                     | 0.0055                                                       | 0.761    | 0.649    |
| 3              | 500.0                                      | 0.0010                                                       | 0.206    | 0.256    |
| 4              | 500.0                                      | 0.0100                                                       | 0.263    | 0.275    |
| 5              | 1000.0                                     | 0.0055                                                       | 0.623    | 0.609    |
| 6              | 1000.0                                     | 0.0055                                                       | 0.567    | 0.589    |
| 7              | 1000.0                                     | 0.0055                                                       | 0.668    | 0.647    |
| 8              | 1000.0                                     | 0.0000                                                       | -0.035   | -0.097   |
| 9              | 1000.0                                     | 0.0055                                                       | 0.753    | 0.678    |
| 10             | 1000.0                                     | 0.0119                                                       | 0.652    | 0.552    |
| 11             | 1000.0                                     | 0.0055                                                       | 0.602    | 0.632    |
| 12             | 1500.0                                     | 0.0010                                                       | 0.325    | 0.545    |
| 13             | 1500.0                                     | 0.0100                                                       | 0.750    | 0.717    |

**Table S2**

Analytical characteristics of the calibration curves of the Fe<sup>3+</sup>-1,10-phenanthroline system in the presence of grape and onion CDs.

| Parameter                                       | Fe <sup>3+</sup> -Grape CD                 | Fe <sup>3+</sup> -Onion CD                 | Fe <sup>2+</sup>                           |
|-------------------------------------------------|--------------------------------------------|--------------------------------------------|--------------------------------------------|
| Linear range (mol L <sup>-1</sup> )             | 4.6×10 <sup>-6</sup> -1.6×10 <sup>-4</sup> | 9.0×10 <sup>-6</sup> -1.6×10 <sup>-4</sup> | 6.0×10 <sup>-6</sup> -1.8×10 <sup>-4</sup> |
| Limit of detection (LOD) (mol L <sup>-1</sup> ) | 1.0×10 <sup>-7</sup>                       | 1.2×10 <sup>-7</sup>                       | 9.6×10 <sup>-8</sup>                       |
| Slope                                           | 7484.4                                     | 6732.7                                     | 8293.7                                     |
| Intercept                                       | 0.02                                       | -0.01                                      | -0.066                                     |
| Correlation coefficient ( <i>r</i> )            | 0.998                                      | 0.994                                      | 0.998                                      |
| <i>F</i> -statistics                            | 5607.7                                     | 3471.9                                     | 10910.3                                    |

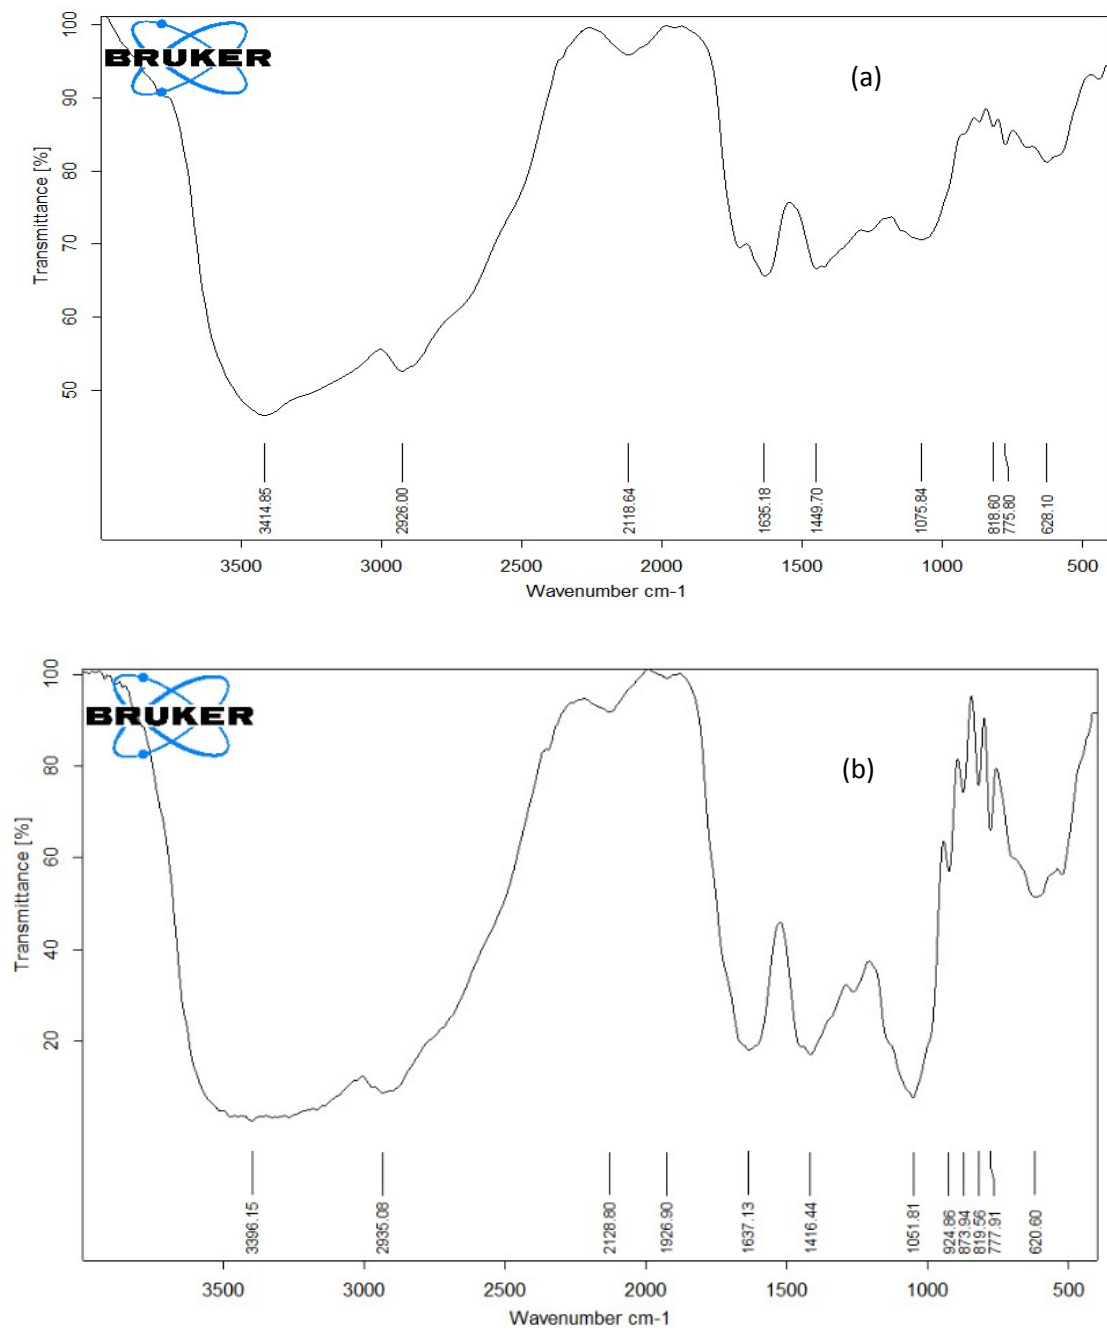

**Fig. 1S.** FTIR spectrum of as-synthesized (a) grape CD and (b) onion CD.
